# Supplementary material
Source: MDPI journal article supplement (https://www.mdpi.com/2073-4344/12/4/368)
Supplement: s1 [file s1]

# SUPPLEMENTARY MATERIAL

## Lignin as a Sacrificial Agent for Tailoring the Properties of ZSM-5 Zeolites

Camila Gomes Flores<sup>a</sup>, Helena Schneider<sup>b</sup>, Benoit Louis<sup>a</sup>

<sup>a</sup> Institut de Chimie et Procédés pour l'Energie, l'Environnement et la Santé (ICPEES) UMR 7515 du CNRS - Université de Strasbourg – 25, rue Becquerel, Strasbourg, 67087 Cedex 2, France

<sup>b</sup> Chemical Engineering Department, Federal University of Rio Grande do Sul – 2777, Ramiro Barcelos, Porto Alegre, 90035-007, Rio Grande do Sul, Brazil

\* Corresponding author: gomesflores@unistra.fr

Figure S1. Nitrogen adsorption isotherm for 4-ZSM-5, a zeolite synthesized with TPAOH during 4 h.

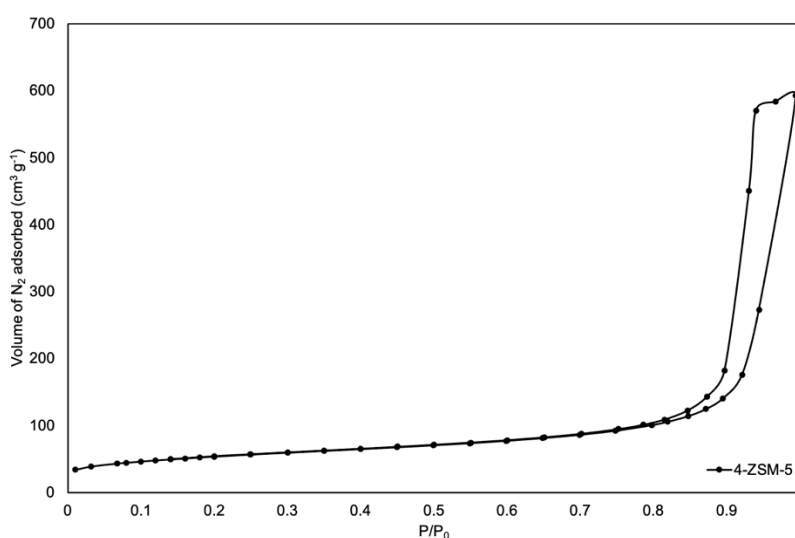

Figure S2. Nitrogen adsorption isotherms for zeolites synthesized with TPAOH (ZSM-5) during 8, 12, 16, 20, and 24 h.

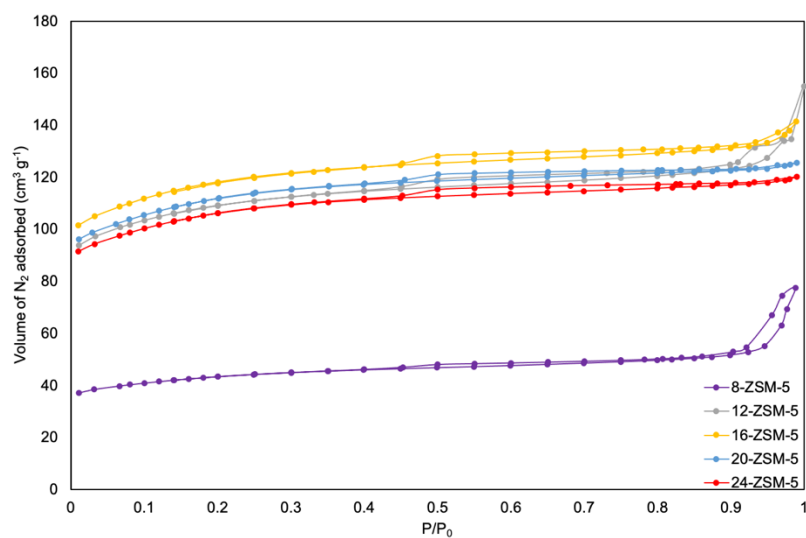

Figure S3. Nitrogen adsorption isotherms for zeolites synthesized with TPAOH and lignin (LZSM-5) during 4, 8, 12, 16, 20, and 24 h.

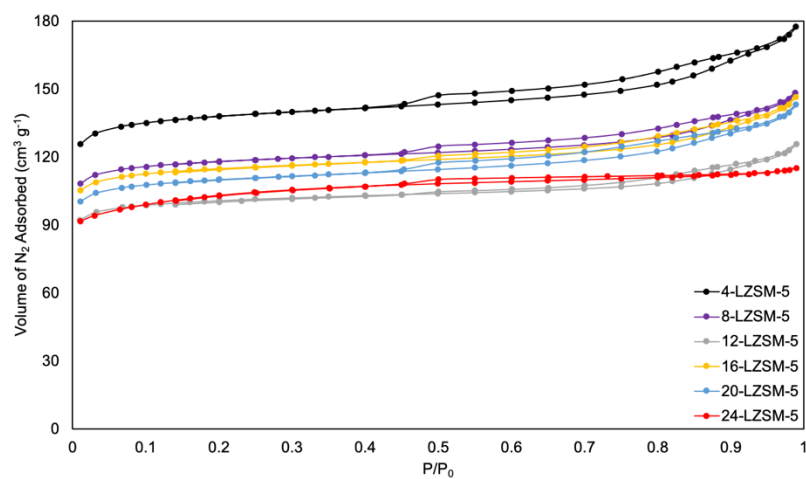

Table S1. Specific surface area ( $S_{\text{BET}}$ ), microporous surface area ( $S_{\text{micro}}$ ), external surface area ( $S_{\text{ext}}$ ), and hierarchy factor (HT) for zeolites synthesized with TPAOH (ZSM-5) and a combination of TPAOH and lignin (LZSM-5) during 4, 8, 12, 16, 20, and 24 h.

| Samples   | $S_{\text{BET}}$ ( $\text{m}^2/\text{g}$ ) | $S_{\text{micro}}$ ( $\text{m}^2/\text{g}$ ) | $S_{\text{ext}}$ ( $\text{m}^2/\text{g}$ ) |
|-----------|--------------------------------------------|----------------------------------------------|--------------------------------------------|
| 4-ZSM-5   | 192                                        | 37                                           | 155                                        |
| 8-ZSM-5   | 143                                        | 90                                           | 53                                         |
| 12-ZSM-5  | 357                                        | 235                                          | 122                                        |
| 16-ZSM-5  | 387                                        | 251                                          | 136                                        |
| 20-ZSM-5  | 368                                        | 224                                          | 134                                        |
| 24-ZSM-5  | 348                                        | 224                                          | 124                                        |
| 4-LZSM-5  | 46                                         | 20                                           | 26                                         |
| 8-LZSM-5  | 86                                         | 10                                           | 76                                         |
| 12-LZSM-5 | 197                                        | 123                                          | 74                                         |
| 16-LZSM-5 | 318                                        | 208                                          | 110                                        |
| 20-LZSM-5 | 352                                        | 301                                          | 51                                         |
| 24-LZSM-5 | 334                                        | 258                                          | 76                                         |
